## 23 **Abstract**

24 Persons with disability have the same sexual and reproductive health needs as people without disability  
25 but their rights have consistently been overlooked. They face numerous challenges to access sexual and  
26 reproductive health services in Nepal, however coherent evidence on nature, size, and extent of these  
27 challenges are not available. We carried out a literature review to explore barriers and facilitators  
28 encountered by persons with disability while accessing sexual and reproductive health services in Nepal.  
29 We reviewed published government policies on reproductive health and disability, searched PubMed  
30 database and used google scholar search engine to find literature published between 2011 to 2021 that  
31 reported on barriers and facilitators to sexual and reproductive health rights for person with disability in  
32 Nepal. Out of 2145 identified literature only 21 literatures meeting the eligibility criteria were included  
33 in the analysis. We found inadequate inclusion of PWDs in health sector policies, lack of knowledge  
34 about SRH needs, misconception and poor attitude and lack of social support in accessing SRH rights and  
35 services. In Nepal, people with disabilities face multitude of barriers in accessing sexual and  
36 reproductive healthcare. Multilevel measures informed by further studies on vulnerabilities and  
37 experience of different subgroups of PWDs.

## 38 **Introduction**

39 Worldwide 15% of the adult population (15 years and older) lives with some form of disability, the  
40 proportion is higher (18%) in low and middle income countries(1) and estimates from Nepal range  
41 between 4.0%(2) to 13.6%(3). Disability is an important social determinant of health(4): person with  
42 disabilities (PWDs) experience lower educational attainment(5), less income(6), and worse health  
43 outcomes(7) compared with people without disabilities. These circumstances reduce access to health and  
44 social services forcing many PWDs into poverty, social exclusion and marginalization(1).

## 45 Sexual and Reproductive Health needs of PWDs

46 Persons with Disabilities have the same SRH needs as people without disability but their rights have  
47 consistently been overlooked and ignored(8). They are often deprived the rights to establish relationships,  
48 marry or to start a family, in extreme cases they are even forced into sterilization, abortion and unwanted  
49 marriages(9). PWDs are restricted from accessing health care for reasons including physical inaccessibility  
50 of facilities and infrastructure, unavailability of suitable and affordable transportation, inappropriate  
51 communication materials, lack of assistive devices, and long waiting times(10). Other factors that drive  
52 poor access to SRH services are health care providers' negative attitudes and ignorance about the health  
53 needs of the PWDs, and lack of insurance or safety net to cover healthcare costs(8). These barriers can  
54 deprive PWDs of basic SRH information. Lack of knowledge and skills in partner negotiation increases the  
55 likelihood of engaging in high-risk behaviors(11). Even when able, PWDs access and use SRH services less  
56 frequently(12,13) increasing the risk of being infected with Human Immunodeficiency virus (HIV) and  
57 other sexually transmitted infections (STIs)(14). Incorrect assumptions and beliefs about the sexual drive  
58 of PWDs, considering them either sexually inactive or hyperactive, can also reduce their access to SRH  
59 services increasing their exposure to abuse and adverse health consequences(15,16). PWDs are at  
60 increased risk of experiencing abuse and gender-based violence, compared to others, they are three times  
61 more likely to become victims of physical and sexual violence, higher among those financially and  
62 physically dependent on the perpetrator(8). A meta-analysis reported that sexual victimization is higher  
63 among women with disabilities.(17)

64 These vulnerabilities underscore that the PWDs require SRH education and care as much as, or possibly  
65 even more than, people without disabilities. However, their SRH rights have been largely ignored by both  
66 the disability community and those working on SRH(8). Universal access to SRH is a fundamental human  
67 right as emphasized in the Sustainable Development Goals on good health and wellbeing and gender  
68 equality(18). Within this context, an understanding of the factors affecting access to SRH information and

69 services by PWDs is urgently needed. This review documents the barriers and facilitators for tailoring SRH  
70 programmes to meet the specific needs of the PWDs in Nepal.

71

## 72 Policy environment for PWDs in Nepal

73 As a signatory to several international human rights instruments including the Universal Declaration of  
74 Human Rights' 1980 and the United Nations Convention on the Rights of PWDs (CRPD) 2006, the Nepal  
75 government is obliged to ensure the rights of PWDs. Over the years Nepal has developed several acts,  
76 namely, Protection and Welfare of the Disabled Persons Act, 1982 and the, the Education Act 1992, Child  
77 Rights Act 1992 and Local Self-governance Act 1999. However, 'The 2013 constitution of Nepal' set out  
78 specific commitments to ensure the basic human rights of its citizens, specifically mentioning to uphold  
79 the rights of PWDs, and moved the needs of PWD higher up the national development agenda. In 2017  
80 Nepal developed an act on 'Rights of the PWDs upholding the eight principles of the United Nations  
81 Convention on the Rights of Persons with Disabilities (CRDP) (respect and dignity, non-discrimination, full  
82 and active participation, respect and accepting PWDs, equal opportunity, accessibility, equality between  
83 gender, respect for children with disability)'. These policy frameworks set out government obligation to  
84 effectively manage disability, and the consecutive national plans increasingly provide for health and  
85 community-based services for PWDs such as rehabilitative schemes, special needs education, and grants  
86 and social security. The Ministry of Women, Children and Senior Citizen is largely responsible for  
87 implementing these programs. Within the health sector, the National Health Policy 2014 mandated  
88 universal and equitable health services, including health care for PWDs under the basic health services,  
89 allocating some funds for treatment of PWDs patients(19). Along with general health services, article 25  
90 of the CRPD also urged member states to ensure the sexual and reproductive health (SRH) rights of PWDs,  
91 through provision of quality health care including SRH as provided to other people(20). Nepal's  
92 Constitution 2015(21) vows to guarantee the SRH rights of its citizens including PWDs. Despite protection

93 of SRH being a constitutional rights, the PWDs continue to face social injustice and are denied their right  
94 to equitable health services(22). Estimates show more than 40% of PWDs in Nepal do not have access to  
95 necessary healthcare service(23). The paucity of published articles on SRH of PWD limited our ability to  
96 make a coherent argument on the barriers and facilitators faced by different subgroups of PWDs in Nepal.  
97 Therefore, we aimed to identify and synthesize the current literature on perceived barriers and facilitators  
98 to SRH among PWDs in Nepal and the interventions to address their needs.

## 99 Theoretical Framework

100 We used the Kaufman et al.'s model on developing a socio-ecological framework(24) to guide organization  
101 and presentation of the results. The model provides a combination of multilevel factors individual (e.g.  
102 beliefs, behaviors), social and community (e.g. norms), institutional and health system (e.g. health  
103 services, education), and structural (e.g. laws, safety, social protection) factors that may interact in  
104 ensuring SRH rights of PWDs.

## 105 **Methods**

106 We carried out a literature review to answer three research questions:

- 107 1. What are the barriers and facilitators to SRH for PWDs in Nepal?
- 108 2. What evidence is there relating to SRH interventions for PWDs in Nepal?
- 109 3. Are PWDs included in SRH policies and guidelines in Nepal?

110

### 111 **Search Strategy**

112 For the purpose of this review the definition of PWDs used was “long term physical, mental, intellectual,  
113 or sensory impairments which, in interaction with various barriers, may hinder their full and effective  
114 participation in society on an equal basis with others”(20) and for SRH the International Conference on  
115 Population and Development (ICPD) definition that includes maternal health, newborn health, family  
116 planning, STIs, including HIV, and gender-based violence(25) was used. These definitions guided  
117 finalization of key search terms.

118 On 9th of March 2022, we searched the PubMed database to retrieve articles. Our search terms  
119 included MESH terms (presented in the supplementary table 1) including search domains “Sexual and  
120 Reproductive Health’, ‘Disability’, and ‘Nepal’. In addition, we used publish or perish software(26) to  
121 search for articles using google scholar search engine using search terms “Sexual and Reproductive  
122 health”, “People with Disability” and “Nepal”. To understand the extent to which PWDs are included in  
123 SRH policies (research question 3), we hand searched websites of organizations working for PWDs,  
124 government reproductive health and disability related policy documents, guidelines, national surveys,  
125 and routine monitoring data from Nepal.

### 126 **Eligibility criteria**

127 We included original articles, case studies, systematic reviews, and grey literature that published  
128 qualitative or quantitative findings relevant to PWD and SRH from Nepal between August 2011 to

129 August 2021, this was done to gain an understanding of the research landscape with a greater precision  
130 during this period. We included all publications reporting on any of the SRH outcomes in the ICPD  
131 definition mentioned earlier.

## 132 Screening

133 Two researchers (SPK and SP) screened the title and abstract of the articles. Those articles not  
134 mentioning barriers or facilitators or SHR outcomes and interventions for PWDs were excluded.

## 135 Data extraction and analysis

136 We extracted information from the included articles on study characteristics (e.g., publication year, study  
137 population, study aim, design), and barriers, facilitators, and intervention characteristics. Similarly, we  
138 extracted information on ownership, inclusion of PWDs and specific activities for PWDs from policy  
139 documents. Two researchers (SPK and SP) extracted the information, and any disagreements were  
140 resolved by consensus after discussing with third researcher (SBW).

## 141 Results

142 Fig 1 shows the screening process of the published articles. Altogether, 2145 articles were identified  
 143 across PubMed (1147) and Google scholar (998). We removed 492 duplicates. Next, we screened the  
 144 title and abstract of the 1653 remaining articles, 1631 were excluded for not reporting on any of the SRH  
 145 outcomes from Nepal. The remaining 21 articles were included in this review.

### 146 Fig 1. PRISMA flow chart of published articles reviewed

### 147 Characteristics of the publications included

148 Table 1 shows the characteristics of the 21 articles included in the review. Sixteen were peer reviewed  
 149 journal articles (6 mixed method, 4 qualitative and 3 quantitative, 1 systematic review, 1 Intervention and  
 150 1 Randomized Control Trial) and the remaining five were: 2 policy papers, 1 situational analysis report  
 151 and two case studies. Out of the 16 peer reviewed articles, 14 reported on female PWDs, two on both  
 152 male and female PWDs, one each reported care takers and health care provider's perspectives. Thirteen  
 153 of the studies were conducted in rural setting and three in both urban and rural settings and for the rest  
 154 not mentioned. One of the studies recruited participants from health facility and another one from  
 155 refugee camp. Sixteen of the 21 studies explored facilitators and barriers to SRH issues.

156 **Table 1: Characteristics of manuscripts included in final review**

| Article                                                                                                                                                                                                                    | Study Design | Explored                                                     | Study site      | Type of disability   | Respondents                                                                | Age group                    |
|----------------------------------------------------------------------------------------------------------------------------------------------------------------------------------------------------------------------------|--------------|--------------------------------------------------------------|-----------------|----------------------|----------------------------------------------------------------------------|------------------------------|
| Devkota, H. R., Kett, M. & Groce, N. Societal attitude and behaviours towards women with disabilities in rural Nepal: Pregnancy, childbirth and motherhood. BMC Pregnancy Childbirth (2019) doi:10.1186/s12884-019-2171-4. | Qualitative  | Beliefs, attitudes, & experiences of women with disabilities | Rural           | Physical and Sensory | Women with and without disabilities and Female Community Health Volunteers | 23-35                        |
| Subedi, L. & Regmi, M. C. PIH30 CHALLENGES FACED BY PEOPLE WITH PHYSICAL DISABILITIES IN ACCESSING SEXUAL AND REPRODUCTIVE HEALTH SERVICES IN EASTERN REGION OF NEPAL. Value Heal. (2019) doi:10.1016/j.jval.2019.09.1211. | Mixed Method | Challenges faced in accessing SRH services by PWDs           | Rural           | Not mentioned        | Male and female PWDs                                                       | Not mentioned in the article |
| Wilbur, J. et al. Qualitative study exploring the barriers to menstrual hygiene management faced by adolescents and young people with a disability, and their carers in the Kavrepalanchok district,                       | Qualitative  | Barrier to menstrual hygiene                                 | Urban and Rural | Physical and Sensory | Adolescent girls with Disabilities Care takers                             | 15-24                        |



|                                                                                                                                                                                                                                                                                                      |                      |                                                                                      |                       |                             |                                                      |                      |
|------------------------------------------------------------------------------------------------------------------------------------------------------------------------------------------------------------------------------------------------------------------------------------------------------|----------------------|--------------------------------------------------------------------------------------|-----------------------|-----------------------------|------------------------------------------------------|----------------------|
| Nepal. BMC Public Health (2021)<br>doi:10.1186/s12889-021-10439-y.                                                                                                                                                                                                                                   |                      |                                                                                      |                       |                             |                                                      |                      |
| Devkota, H. R., Murray, E., Kett, M. & Groce, N. Healthcare provider's attitude towards disability and experience of women with disabilities in the use of maternal healthcare service in rural Nepal. <i>Reprod. Health</i> (2017) doi:10.1186/s12978-017-0330-5.                                   | Mixed Method         | Experience of utilizing maternal health services                                     | Rural Health facility | Physical and Sensory        | Health care providers and women with Disabilities    | 15-49                |
| Devkota, H. R., Murray, E., Kett, M. & Groce, N. Are maternal healthcare services accessible to vulnerable group? A study among women with disabilities in rural Nepal. <i>PLoS One</i> (2018) doi:10.1371/journal.pone.0200370.                                                                     | Mixed Method         | Challenges encountered in accessing maternal healthcare services                     | Rural                 | Physical and sensory        | Women with and without disabilities                  | 15-49                |
| Shiwakoti, R. et al. Factors affecting utilization of sexual and reproductive health services among women with disabilities- A mixed-method cross-sectional study from Ilam district, Nepal. <i>BMC Health Serv. Res.</i> (2021) doi:10.21203/rs.3.rs-131588/v1.                                     | Mixed Method         | Factors affecting utilization of SRH services                                        | Rural                 | Physical, Sensory and Motor | Woman with Disabilities                              | 15-49                |
| Raut, N. Case studies on sexual and reproductive health of disabled women in Nepal. <i>Asian J. Women's Stud.</i> (2018) doi:10.1080/12259276.2018.1424700.                                                                                                                                          | Case Study           | Experience and the challenges in seeking SRH information and services                | Not mentioned         | Physical and Sensory        | Woman with Disabilities                              | 20-40                |
| Adhikari, K. P. Realising the Rights of Persons with Disability in Nepal: Policy Addresses from the Health, Education and Livelihoods Perspectives. <i>Nepal. J. Dev. Rural Stud.</i> (2019) doi:10.3126/njdrs.v16i0.31532.                                                                          | Policy Review        | Review of policies and programmes for the protection of rights and wellbeing of PWDs | Not mentioned         | Not mentioned               | Not applicable                                       | Not mentioned        |
| Institute of Development Studies. Disability Inclusive Development Nepal Situational Analysis June 2020 update. 40 (2020).                                                                                                                                                                           | Situational Analysis | Analysis of current situation for PWDs in Nepal                                      | Not mentioned         | Not mentioned               | Not applicable                                       | Not mentioned        |
| Tanabe, M., Nagujah, Y., Rimal, N., Bukania, F. & Krause, S. Intersecting Sexual and Reproductive Health and Disability in Humanitarian Settings: Risks, Needs, and Capacities of Refugees with Disabilities in Kenya, Nepal, and Uganda. <i>Sex. Disabil.</i> (2015) doi:10.1007/s11195-015-9419-3. | Qualitative          | Risks, needs, and barriers to access SRH services                                    | Rural, Refugee Camp   | Multiple disabilities       | Men and women refugees with disabilities             | M (15-59), F (15-49) |
| Puri, M., Misra, G. & Hawkes, S. Hidden voices: prevalence and risk factors for violence against women with disabilities in Nepal. <i>BMC Public Health</i> (2015) doi:10.1186/s12889-015-1610-z.                                                                                                    | Mixed method         | Risk factors, and consequences of violence                                           | Urban and Rural       | Physical and Sensory        | Women with Disabilities                              | 16-49                |
| Morrison, J. et al. Disabled women's maternal and newborn health care in rural Nepal: A qualitative study. <i>Midwifery</i> 30, 1132–1139 (2014).                                                                                                                                                    | Qualitative          | Experiences of accessing maternal and newborn care                                   | Rural                 | Physical and Sensory        | Women with Disabilities and Auxiliary Nurse Midwives | Not mentioned        |
| Gupta, J. et al. Disability status, intimate partner violence and perceived social support among married women in three districts of the Terai region of Nepal. <i>BMJ Glob. Heal.</i> (2018) doi:10.1136/bmjgh-2018-000934.                                                                         | Quantitative         | Associations between severity of Disabilities and intimate partner violence          | Rural                 | Not mentioned               | Women with Disabilities                              | 18-49                |
| Cardoso, L. F. et al. Menstrual restriction prevalence and association with intimate partner violence among Nepali women.                                                                                                                                                                            | Quantitative         | Prevalence of menstrual restrictions                                                 | Rural                 | Not mentioned               | Married women, subgroup                              | Not mentioned        |

|                                                                                                                                                                                                                                                                                                                   |                   |                                                                                                                                                                                                                    |                 |                         |                                                |               |
|-------------------------------------------------------------------------------------------------------------------------------------------------------------------------------------------------------------------------------------------------------------------------------------------------------------------|-------------------|--------------------------------------------------------------------------------------------------------------------------------------------------------------------------------------------------------------------|-----------------|-------------------------|------------------------------------------------|---------------|
| BMJ Sex. Reprod. Heal. (2019)<br>doi:10.1136/bmjsex-2017-101908.                                                                                                                                                                                                                                                  |                   | experienced by married women                                                                                                                                                                                       |                 |                         | analysis for women with Disabilities           |               |
| Haworth, E. J. N. et al. Prenatal and perinatal risk factors for disability in a rural Nepali birth cohort. BMJ Glob. Heal. (2017) doi:10.1136/bmjgh-2017-000312.                                                                                                                                                 | RCT               | Antenatal, birth and neonatal factors associated with disability in childhood                                                                                                                                      | Rural           | Not mentioned           | Married women with infants                     | Not mentioned |
| Wilbur, J., Mahon, T., Torondel, B., Hameed, S. & Kuper, H. Feasibility study of a menstrual hygiene management intervention for people with intellectual impairments and their carers in Nepal. Int. J. Environ. Res. Public Health (2019) doi:10.3390/ijerph16193750.                                           | Feasibility       | explores the campaign's feasibility and acceptability                                                                                                                                                              | Rural           | Intellectual impairment | Young women and their carers                   | 15–24         |
| Wilbur, J. et al. Are Nepal's water, sanitation and hygiene and menstrual hygiene policies and supporting documents inclusive of disability? A policy analysis. Int. J. Equity Health (2021) doi:10.1186/s12939-021-01463-w.                                                                                      | Policy analysis   | assesses the inclusion of disability in Nepal's policy and guidance relevant to water, sanitation, and hygiene (WASH), and menstrual hygiene management                                                            | Rural           | Not mentioned           | Not mentioned                                  | Not mentioned |
| Wilbur, J. et al. Developing behaviour change interventions for improving access to health and hygiene for people with disabilities: Two case studies from Nepal and Malawi. Int. J. Environ. Res. Public Health (2018) doi:10.3390/ijerph15122746.                                                               | Case study        | Demonstrate frameworks that can be applied, to document the interventions developed to encourage initiatives to advance health services targeting people with disabilities.                                        | Not mentioned   | Not mentioned           | Adolescents and young people                   | Not mentioned |
| Devkota, H. R., Clarke, A., Murray, E. & Groce, N. Do experiences and perceptions about quality of care differ among social groups in Nepal?: A study of maternal healthcare experiences of women with and without disabilities, and Dalit and non-Dalit women. PLoS One (2017) doi:10.1371/journal.pone.0188554. | Quantitative      | Compare perceptions of the quality of maternal healthcare services between two groups that are consistently considered vulnerable, women with disabilities from both the non-Dalit population and Dalit population | Urban and Rural | Not mentioned           | women with disabilities, Dalits and non-Dalits | 15-49         |
| Hameed, S. et al. From words to actions: Systematic review of interventions to promote sexual and reproductive health of PWDs in low- And middle-income countries. BMJ Glob. Heal. (2020) doi:10.1136/bmjgh-2020-002903.                                                                                          | Systematic review | assessed interventions to promote SRHR for PWDs in low- and middle-income countries.                                                                                                                               | Not mentioned   | Not mentioned           | Women with severe impairment                   | Not mentioned |

|                                                                                                                                                                                                                                                                                         |              |                                                                                                                                                                                       |       |               |                                                |       |
|-----------------------------------------------------------------------------------------------------------------------------------------------------------------------------------------------------------------------------------------------------------------------------------------|--------------|---------------------------------------------------------------------------------------------------------------------------------------------------------------------------------------|-------|---------------|------------------------------------------------|-------|
| Devkota, H. R., Clarke, A., Murray, E., Kett, M. & Groce, N. Disability, Caste, and Intersectionality: Does Co-Existence of Disability and Caste Compound Marginalization for Women Seeking Maternal Healthcare in Southern Nepal? Disabilities (2021) doi:10.3390/disabilities1030017. | Mixed method | Study explored this complex relationship and the multiple perspectives of Dalit women with and without disability about their access and utilization of maternal health care services | Rural | Not mentioned | women with disabilities, Dalits and non-Dalits | 15-49 |
|-----------------------------------------------------------------------------------------------------------------------------------------------------------------------------------------------------------------------------------------------------------------------------------------|--------------|---------------------------------------------------------------------------------------------------------------------------------------------------------------------------------------|-------|---------------|------------------------------------------------|-------|

157

## 158 Barriers and Facilitators for SRH of PWDs

159 Out of the 21 publications, eleven reported on individual level(27–35)(36)(37) and institutional and  
 160 health systems level(27–29,31–34,38,39)(40), seven reported on social and community  
 161 level(27,29,31,39)(30)(32)(41) and only three reported on structural level factors(31)(42) (38). The  
 162 overview of the barriers and facilitators experienced by the PWDs are presented in table 2 and 3.

163 **Table 2: Overview of the Barriers to SRH for PWDs**

164

| Category                    | Subcategory          | Themes                    | Number of studies           | quotation                                                                                                                                                                                                                                                                                                                                                   |
|-----------------------------|----------------------|---------------------------|-----------------------------|-------------------------------------------------------------------------------------------------------------------------------------------------------------------------------------------------------------------------------------------------------------------------------------------------------------------------------------------------------------|
| <b>Individual</b>           | Self-efficacy        | Low self-esteem           | Four <sup>27,29,31,34</sup> | Many disabled women were embarrassed and this often prevented them from telling their in-laws about their pregnancy <sup>38</sup> . Participants felt humiliated when asking another person to change their menstrual product, and guilt seeing their care providers handle their menstrual blood <sup>29</sup> .                                           |
|                             | Education            | Knowledge and information | Three <sup>28,29,32</sup>   | Nearly 26.7% of PWDs do not have knowledge about the disability rights provided by the government and 94.2% of the respondents think there is no easy access of SRH services for them <sup>28</sup> .                                                                                                                                                       |
|                             | Socioeconomic status |                           | Three <sup>31,32,34</sup>   | Those women with disabilities who were ever married are 122 times more likely to utilize SRH services compared to those who were never married <sup>32</sup> . Data suggests that poverty was more of a barrier than embarrassment or bad behavior of health workers, and many women felt it was inevitable that they would deliver at home <sup>38</sup> . |
|                             | Severity             |                           | Five <sup>29,31–33,35</sup> | Women with hearing impairments were identified as being particularly at risk of sexual violence <sup>34</sup> . User's disability status was the influencing factor in receiving services <sup>31</sup> .                                                                                                                                                   |
| <b>Social and community</b> | Socio cultural norms | Belief and attitude       | Four <sup>27,29,31,39</sup> | If a mother cannot see the baby, hear the baby cry or play with them, then what would be the point of having a baby <sup>27</sup> . Disability was also viewed as a curse. Therefore, people feared that they will be doubly cursed if they did not follow restrictions <sup>29</sup> .                                                                     |

|                                        |                          |                                       |                             |                                                                                                                                                                                                                                                                                                                                                                                                                                                                                                                                           |
|----------------------------------------|--------------------------|---------------------------------------|-----------------------------|-------------------------------------------------------------------------------------------------------------------------------------------------------------------------------------------------------------------------------------------------------------------------------------------------------------------------------------------------------------------------------------------------------------------------------------------------------------------------------------------------------------------------------------------|
|                                        | Education                | Knowledge and information             | Two <sup>27,30</sup> ,      | Some participants reported that they faced challenges due to preconceived mind-sets and limited understanding about disability and disabled people's desire and expectations <sup>30</sup> . Some of the women with disabilities reported that their parents did not understand their emotional and sexual needs and never talked to them about marriage <sup>27</sup> .                                                                                                                                                                  |
|                                        | Support system           |                                       | Three <sup>27,29,33</sup>   | In the case where family members are absent, they believe they are more prone to sexual violence, so they provide Depo-Provera injection to prevent the individual from being pregnant <sup>32</sup> . Her husband was blamed for marrying her and excluded for several years by his parents and relatives <sup>27</sup> .                                                                                                                                                                                                                |
| <b>Institutional and health system</b> | Cost                     |                                       | Three <sup>30,33,43</sup> , | Respondents reported to receive good service from government officials only if they have money otherwise there was no service without finances <sup>35</sup> . It is often costly and time-consuming to transport patients to health facilities generally, and it is even more costly for people with disabilities when an additional person is needed to accompany them <sup>31</sup> .                                                                                                                                                  |
|                                        | Social norms             | Behavior                              | Three <sup>29,31,34</sup>   | One care provider reported that a teacher sent her daughter home from school at the onset of menarche, and the care provider never sent her back <sup>29</sup> .                                                                                                                                                                                                                                                                                                                                                                          |
|                                        |                          | Providers gender                      |                             | All the women interviewed reported that they felt uncomfortable while examined by a male provider for maternity care and hesitated to seek services next time <sup>31</sup> .                                                                                                                                                                                                                                                                                                                                                             |
|                                        |                          | Attitude                              |                             | Many women with disabilities reported that the attitudes of providers and their understanding about disability were negative and often discouraging, expressing concern about SRH choices of women with disabilities <sup>30</sup> .                                                                                                                                                                                                                                                                                                      |
|                                        | Support from authorities |                                       |                             | Respondents reported that even the authorities'/police officials, when are reported to domestic violence do not provide support to the disabled <sup>35</sup> .                                                                                                                                                                                                                                                                                                                                                                           |
|                                        | Resources                | Physical (infra structure/ wait time) | Six <sup>28-31,38,39</sup>  | Inconvenient and limited opening hours of health facilities were often reported by participants in their qualitative interviews as one of the reasons for non-utilization of services <sup>31</sup> .                                                                                                                                                                                                                                                                                                                                     |
|                                        | Education                | Knowledge                             | Three <sup>30,33,34</sup> , | The rejection of women with disabilities by the health facility for services could be an indicator of lack of knowledge and experience among providers or established prejudice <sup>31</sup> .                                                                                                                                                                                                                                                                                                                                           |
|                                        |                          | Communication skills                  |                             | Providers did not explain things to them properly or give information about their pregnancy while attending antenatal clinics. It was evident that only a very few were advised to go for delivery in a health facility and none of them were informed about the need for post-natal check-ups <sup>30</sup> . Even in hospitals, they do not get the same treatment as others if they do not have a sign language interpreter. Sometimes, they communicate by writing but it is impossible for illiterate people do that <sup>33</sup> . |
| <b>Structural</b>                      | Policy                   | Inclusion                             | One <sup>42</sup>           | The act is silent about reproductive and sexual health rights of women/girls with disabilities and management of reproductive impairments explicitly <sup>42</sup>                                                                                                                                                                                                                                                                                                                                                                        |
|                                        | Resources                | Implementation and funding            | One <sup>31</sup>           | Due not only to limited resources but to poor implementation of policies, the most marginalized and vulnerable women are the least likely to receive these benefits <sup>31</sup> . A respondent reported she was asked to pay 60 thousand to access maternal healthcare services in multiple health facility, even though safe motherhood program is in place <sup>31</sup> .                                                                                                                                                            |
|                                        | Organization Capacity    |                                       | One <sup>38</sup>           | Despite several organizations working on disability issues in the district, other organization are providing SRH services <sup>38</sup> .                                                                                                                                                                                                                                                                                                                                                                                                 |

165 **Table 3: Overview of facilitator for SRH and PWDs**

| Category                        | Subcategory              | Themes                  | Number of studies         | quotation                                                                                                                                                                                                                                                                                                                                                                                                                                                                          |
|---------------------------------|--------------------------|-------------------------|---------------------------|------------------------------------------------------------------------------------------------------------------------------------------------------------------------------------------------------------------------------------------------------------------------------------------------------------------------------------------------------------------------------------------------------------------------------------------------------------------------------------|
| Individual                      | Empowerment              | Coping                  | Three <sup>27,35,38</sup> | Most women had chosen their partner, a stark contrast to the social practices, where arranged marriages remain the norm. When families had not considered arranging a marriage for them; they had sought a partner of their own and lived separately from the extended family <sup>27</sup> .                                                                                                                                                                                      |
| Social and community            | Social norm              | Beliefs                 | One <sup>27</sup>         | Many of the participants believed that emotions and desires about sexuality and pregnancy for women with disabilities are the same as for women without disabilities <sup>27</sup> .                                                                                                                                                                                                                                                                                               |
|                                 | Social support mechanism | Emotional and financial | Three <sup>27,32,34</sup> | Home-based refugees reported family members, especially mothers, as safe resources. While self-help activities were on the whole limited, participants noted their ability and willingness to share information with each other and with other refugees and leaders in the community <sup>34</sup> . They reported that their partners had married them expecting to acquire their parent's property as part of the dowry, which was an incentive for the marriage <sup>27</sup> . |
| Institutional and health system | Social Norm              | Attitude                | One <sup>30</sup>         | Slightly higher mean attitude towards disabled persons scores to those who gave maternal healthcare services to women with disabilities than those who did not (79.49 vs 76.35), however, this difference was not significant $P > 0.05$ <sup>30</sup> .                                                                                                                                                                                                                           |
|                                 |                          | Respectful              |                           | Many reported that the providers were kind, caring and treated them respectfully in a welcoming environment. Several stated that they received counselling and advice in their ANC visits and support during childbirth by the nurses and doctors <sup>30</sup> .                                                                                                                                                                                                                  |
| Structural                      | Organizations for PWDs   |                         | Two <sup>38,36</sup>      | Sample reported presence of several organizations working on disability issues in the district <sup>38</sup> . Another study reported campaign ensuring to help people with intellectual impairment and their carers in regards to menstrual hygiene management <sup>36</sup> .                                                                                                                                                                                                    |

166

167 *Individual*

168 Out of the eleven publication reporting on individual level barriers (27–35)(36,40), four  
 169 publications(28,29,32)(36) identified lack of information and knowledge about the disability and SRH  
 170 service availability as a barrier. For example, a study exploring barriers to menstrual hygiene among  
 171 adolescent girls with disabilities reported that the guardian were in disbelief when they had menses as  
 172 they presumed menarche would be delayed or not have menses(29). A quantitative study exploring  
 173 challenges of seeking SRH services by PWDs reported that nearly 94.2% thought the SRH services were  
 174 inaccessible(28), and another article reported that women with disabilities do not report violence because  
 175 they lack information on where and how to report(33). Four articles identified perceived low self-efficacy  
 176 and esteem from experiencing constant fear and humiliation as a barrier for women with disabilities to

177 exercise SRH rights (27,29,31,34). Studies reported they were not able to share their needs or problems  
178 (31), or even too embarrassed to share the news of their pregnancy to their parents and in-laws (34).  
179 Three publications highlighted socio economic status as a barrier (31,32,34). One study exploring factors  
180 affecting utilization of SRH services reported, compared to unmarried women with disabilities those  
181 married were more likely to utilize SRH services(31). Similarly, an article reported poverty was a bigger  
182 barrier than health worker’s behavior to access maternal health care therefore women with disability  
183 often choose to give birth at home(34). Five publications highlighted that the type and severity of disability  
184 increased their vulnerabilities (29,31–33,35), for example a study among refugee women reported that  
185 those with hearing impairments were more likely to experience sexual violence(32). Another study  
186 exploring risk factors of violence among women with disability reported being disabled was the major  
187 reason for experiencing violence including rape and the situation gets worse as condition  
188 deteriorates(33).

189 This review also found some facilitators, three of the studies reported individual level facilitators, such as  
190 coping and receiving preferential services(27,35,38). One study reported how women with disability were  
191 challenging the social norms of arranged marriage by taking matters in their own hand to choose a life  
192 partner and living separately from their extended family(27). Another study reported that compared to  
193 women with no disability those with disability were more likely to report violence (sexual and  
194 physical)(35).

### 195 Social and community

196 Five publications reported socio cultural norms as a barrier to SRH rights, particularly for women with  
197 disabilities(27,29,31,39)(41). Discrimination and harassment based on erroneous beliefs about PWDs’  
198 sexuality, ability to reproduce and child care were common(27,29,31,39). For example, a qualitative study  
199 exploring attitudes and behaviors towards women with disability in rural Nepal reported that family and  
200 neighbors constantly questioned disabled women’s desire and ability to raise a child, while their ability to

201 perform other physically demanding household chores was never questioned(27). The same study also  
202 reported that societal assumptions that women with disability are powerless weakens and instills fear and  
203 insecurity in them. Taboos relating to menstruation and pregnancy outside marriages are common,  
204 however two publications reported their repercussions were severe for women with disability(29,32).  
205 One of the study exploring utilization of SRH services reported women with disability particularly those  
206 with no family members were offered/encouraged to use contraception without proper consent with  
207 assumptions they were more likely to encounter sexual violence leading to unwanted pregnancy(31). A  
208 study from refugee camp setting reported discrimination against women who became pregnant outside  
209 marriage forced some to flee their homes, and others to kill themselves(32).  
210 Two publication reported poor knowledge on disability and SRH needs of PWDs as a barrier(27,30),  
211 including among health workers (30). A case study of women with disability reported that they were  
212 discouraged to have children fearing the off springs will also be disabled increasing the burden of disability  
213 in the society (39).  
214 Three studies reported lack of social support as a barrier for SRHR (27,29,33), for example one study  
215 reported that she and her husband were banished by his family for marrying (27), while in another the  
216 girl was abused and called names for marrying(33). A study among care takers of PWDs reported they felt  
217 isolated and overwhelmed from having to take care of the PWDs on their own (29).  
218 In terms of facilitators, the same study (27) that reported strong social norms as barriers also reported  
219 belief that emotion and desires about sexuality were similar for women with and without disabilities were  
220 also prevalent and thus they should be encouraged to have children for security and support in old age.  
221 Three studies reported support from family and friends was valuable resource's for PWDs(27,32)<sup>34</sup>. For  
222 example, PWDs felt reassured when they were accepted by and received support from the in-laws(27).  
223 However, in some instances parents were over protective hindering PWDs prospect of marriage, while

224 some parents found suitors willing to marry for dowry but such marriages were reported not to end  
225 well(27).

### 226 *Institutional and health system*

227 Eleven publications(27–29,31–34,38,39)·(37)·(40) reported on institutional level barriers. Six of them  
228 reported inadequate physical infrastructure (facilities, opening time, remoteness)(28–31,38,39). For  
229 example, one study reported lack of ramps for wheelchair access and inconvenient opening hours of the  
230 health facilities(30). Five publications identified cost as a barrier(30,33,43)·(37)·(40)For example, a study  
231 reported that good health care services are not accessible for those without resources to pay them(33).  
232 Another study among disabled woman in rural setting further elaborated it was not just the users fees,  
233 but also travel cost of her and the companion, as they are unable to travel on their own(30).

234 Inadequate education (knowledge and skills) of health workers to effectively interact and communicate  
235 with PWDs was reported by three publications(30,33,34). For example, a study focusing on healthcare  
236 provider’s attitudes(38) highlighted health care providers avoid talking to the PWDs when providing care  
237 and lacked confidence to handle maternal health care such as child birth. Health facilities often denied  
238 health care to persons with severe disabilities citing incapability to provide services(30).

239 Three publications(29,31,34) highlighted social norms such as belief and attitudes help by service  
240 providers driving health system barriers. For example, a study reported that doctors advised women with  
241 disability to not to have any more children with no further explanation(38). According to one qualitative  
242 study among adolescent girls with disability(29), adolescent girls were sent home by teachers after having  
243 menses never returning to school, such attitude and response by teachers ended any chance they had of  
244 receiving SRH education from school. Similarly, two study(29,33) reported lack of support by those in  
245 authority, a study focusing on violence against woman with disability showed that police officials do not



246 provide any kind of support when violence is reported(33). The same study further elaborated that  
247 violence were less likely to be reported if it was inflicted by an intimate partner(33).

248 Only one publication reported institutional facilitator that the health workers providing maternal health  
249 services to women with disability had better attitude compared to those not providing services to women  
250 with disability, in support the women with disability also shared they felt respected by health care  
251 providers(30).

### 252 Structural

253 The findings for structural barriers are based on findings from article review as well as the review of  
254 policies and data sources. Supplementary table 2 shows the list of policy documents (strategies,  
255 guidelines, plans and acts) the researcher reviewed. Altogether 19 policies (10 on broader health policies,  
256 9 specific to SRH and 2 on protecting rights of the PWDs) of Nepal government were reviewed.

257 With regards to structural barriers, this review found little inclusion of SRH rights of PWDs in policies and  
258 programming. While the constitution of Nepal guarantees universal, non-discriminatory and free SRH care  
259 services for marginalized groups including PWDs(42), these aspirations were not carried through into  
260 policy. The National Health Policy 1991 mentions engaging with the private sector to provide  
261 rehabilitation services for PWDs whereas the most recent National Health Policy 2019 talks of providing  
262 reproductive health services through lifecycle approach in providing with no particular mention of PWDs.  
263 Another policy analysis document shows that disability is not fully covered in policy documents and  
264 MHM's disability policy commitments are almost non-existent(41), this resulted in limited professional  
265 understanding of the issues, as service providers had no training.

266 Only eight out of 19 policy documents reviewed touched upon SRH rights of PWDs, but most mentioned  
267 PWDs as a marginalized group without outlining specific activities or strategies designed to meet their  
268 needs. Fig 2 shows that the timelines of policies that have included SRH rights of PWDs, almost all of them

269 are after the CRDP. Two acts(44,45) and a guideline(46) have called for protecting SRH rights of PWDs  
270 with special focus on women through provision of disability friendly reproductive health services including  
271 sexual harassment and violence. The guideline(46) further elaborated the need to raise awareness and  
272 enhance the communication and counselling skills of health workers and to raise awareness among PWDs  
273 on availability of SRH services. A standard for maternal and newborn care(47) recommends equitable  
274 access to perinatal care for women with disabilities stressing the need for additional information and  
275 resources to facilitate the labor, child birth and lactation. Similarly, Nepal safer motherhood and newborn  
276 health roadmap talks about improving access to maternal and newborn care through home visits to  
277 provide care and provision of devices to facilitate communication. A costed implementation plan(48) for  
278 family planning allocated funds to develop a national strategy to address legal and socio-cultural barriers  
279 faced by PWDs in accessing family planning services.

## 280 **Fig 2. Timeline of policy documents that have mentioned SRH of PWDs**

281 Two of the policies(46,49) reviewed urged the MoHP to conduct research assessing the SRH needs of  
282 PWDs and one(49) of them further calls to establish a surveillance system for PWDs in reproductive age  
283 and share the information with stakeholders to guide evidence based policy and programming for  
284 PWDs. However, we found paucity of data on SRH of PWDs to guide development of SRH programs for  
285 PWDs. Supplementary Table 3 show national level data sources(50–57) (1 census, 6 surveys and 1 health  
286 system monitoring data). Four of them collected data on SRH, such as utilization of SRH services(50–  
287 52,55), knowledge and access to SRH services(50,51,55) and violence and harassment experience  
288 (50,51). However, only two data sources census and multi-indicator cluster survey had data  
289 disaggregated by disability status, but only the later had SRH data on PWDs disaggregated by gender.

290 Our findings from assessment of websites of 12 national level organizations that the authors knew worked  
291 for PWDs are presented in supplementary table 4. We found SRH rights and services were not prioritized

292 within their programming, only two organizations mentioned taking up SRH issues of PWDs. However, it  
293 was not clear what kind of interventions were implemented and our searches yielded no published work  
294 about them or on any other interventions hinting lack of SRH intervention for PWDs. This was validated  
295 from one of the publication(34) included in the review that reported organizations working with PWDs  
296 did not provide SRH interventions (information and services). Similarly, a study(29) exploring barriers to  
297 menstrual hygiene among women with disabilities reported unavailability of support mechanisms or  
298 networks for PWDs and their care takers.

## 299 **Discussion**

300 This paper assessed evidence on barriers and facilitators faced by PWDs in recognizing their rights and  
301 accessing SRH services in Nepal. The common barriers reported in the reviewed literature were exclusion  
302 of PWDs from health and SRH policies, lack of knowledge, socio cultural norms and inadequate support  
303 system. However, facilitators to PWD uptake of SHR services were rarely discussed – they were and only  
304 reported in passing by five studies. Overall, many of the barriers were also reported in studies from low  
305 and middle income countries in Sub-Saharan Africa(58), rural Cambodia(59), and North India (60) and the  
306 UK(61).

307 The literature on the situation in Nepal suggests similarities with the situation in other countries: lack of  
308 knowledge and education (58–63), lack of disability friendly infrastructure(58) and poor attitude of health  
309 care providers (58,60,62) . Barriers to SRH for PWD in Nepal that we identify in our review are similar to  
310 barriers to access among PWD for general health care(64). We found inadequate mention of PWDs and  
311 their rights in health policies in Nepal, in fact health policies appear to have regressed in terms of  
312 highlighting rights to healthcare for PWDs. For instance, while the 1991 national health policy mentions  
313 providing rehabilitative services for PWDs, the 2019 policy omits this altogether. Such systematic  
314 exclusion of PWDs in the sectoral plans have also been reported in reviews from Africa and Mediterranean  
315 regions(58,65,66). If left unchallenged the SRH rights of PWDs will continue to be neglected undermining  
316 the country's ability to ensure universal access to SRH services. It is worth noting that some of the most  
317 recent policy documents have begun to fulfill the country's commitment to international human rights  
318 instruments by including SRH needs of PWDs. Despite these policy initiatives, a study among women with  
319 disability reported that poor implementation of policies, and cost of the maternal health care were major  
320 hindrance to access SRH care(30). Thus, raising questions on the level of commitment, and highlighting  
321 the need for further exploration of gaps in policy implementation.

322 In parallel with our findings a systematic review including studies mostly from high income countries  
323 reported negative attitudes and stigma around SRH needs of women with disabilities, it found people  
324 including parents were uncomfortable with PWDs being sexually active(67). In fact, the PWDs themselves  
325 held such misconceptions often due to inadequate knowledge about their SRH rights, poor awareness on  
326 policies and provisions made by the government (68) leading to reluctance in seeking and demanding SRH  
327 information and services. Similarly, we found girls with disabilities were discouraged to go to school after  
328 onset of menses, as was also reported by a systematic review outside Nepal depriving girls from school  
329 was a coping mechanisms parents used to avoid embarrassment caused by their daughter’s inability to  
330 follow social and cultural norms on mensuration(67). These misconceptions imply poor understanding  
331 and awareness of disability and sexuality of PWDs; therefore, this suggests that educating the public on  
332 SRH needs of PWDs and their right to lead a safe and satisfying sexual life. Such education can also be  
333 mainstreamed into the formal education system for lasting positive socio-cultural change. In addition,  
334 activities to empower persons living with disabilities such as educating them on their SRH rights are  
335 important for them- to confidently access SRH services.

336 Sexual violence and subsequent lack of access to legal and social support for women with disabilities found  
337 during this review have also been reported by a study from Senegal(69). A probable reason for deterring  
338 them from seeking care and support may be due to fear of victimization.(17) To encourage women with  
339 disabilities to report violence and use SRH services, the care and support system may have to shift from  
340 imposing long term contraception on women with disabilities to avoid the consequences of sexual  
341 violence by investing in training and education of the social and health care workers to recognize signs of  
342 violence and respecting women with disabilities and encouraging them to understand their rights. In  
343 addition, those providing care or guardians must also be empowered to dismiss wrong socio-cultural  
344 beliefs, one way to achieve this is to form support groups of guardians, where they can discuss their  
345 concerns, find solutions and voice their concerns jointly when dealing with authority.

346 Several health system barriers such as lack of knowledge about needs of PWDs, poor communication skills  
347 of health care professionals, and cost of health care identified during this review undermine the SRH rights  
348 of PWDs. Several studies (62,70,71) have shown these factors negatively affect the relationship between  
349 health care providers and PWDs discouraging them from using health care services. Therefore, for  
350 effective interpersonal relationship based on clear communication and trust, the government should  
351 provide regular training to the health care providers on SRH rights of PWDs and to provide non-judgmental  
352 SRH information and services. Similarly, health facilities must accommodate the specific needs of persons  
353 with all forms of disabilities such as making provisions for an in house or outsource when needed a sign  
354 language interpreter, wheelchair accessible ramps, toilets, beds, and equipment.

355 Agreeing with our findings, a systematic review from low and middle income countries has reported a  
356 strong link between poverty and disability (72), while others have reported type and severity of disability  
357 (62,70) determined access to health care. Poverty makes SRH services unaffordable, and also the  
358 negative attitudes towards PWDs may get worse with poverty(72). Such findings underscore the urgent  
359 need to elaborate on the right based equitable health service vision inscribed in the policy documents  
360 with sufficient allocation of resources to implement them.

361 Apart from barriers, our study also identified few facilitators such as PWDs were empowered enough to  
362 choose their own partner, supportive family members, and instances of good treatment by health care  
363 providers. These show that social support system exists in the society, there is the need to identify and  
364 tap on such good examples to develop a well thought out culturally appropriate programs and  
365 interventions to support PWDs and their family to exercise their SRH rights in respectful manner.

366 Overall, our review has two important strengths. First, to the best of our knowledge, this is the first review  
367 to identify and synthesize the current literature on perceived barriers and facilitators to SRH among PWDs  
368 and the interventions to address their needs in Nepal. Second, we reviewed policies, published paper and  
369 national sources of data to enrich our findings from various angles. However, this review also had some

370 limitation, first, restricting our search to only one database and studies published between 2011-2021  
371 may have excluded some relevant publications. Second, this review did not report on the extent of  
372 interaction between these barriers to influence access to SRH services. Third, most of the studies reviewed  
373 were done among women with disabilities, therefore the barriers and facilitators faced by men are not  
374 properly articulated in this review.

## 375 **Conclusion**

376 In summary, we found that inadequate inclusion of PWDs in health sector policies, lack of knowledge  
377 about SRH needs, misconception and poor attitude and lack of social support system were the main  
378 barriers to accessing SRH rights and services in Nepal. Understandings from this review could be used to  
379 develop a roadmap to address access barriers at various level; national, institutional or health system,  
380 individual and community level. In addition, further studies exploring experience from different subgroups  
381 of PWDs, their guardians and health care providers are needed to substantiate the findings from this  
382 review.

383

## 384 **Acknowledgement**

385 The authors would like to thank Catherine McGowan for guiding with the scoping review process.

## 386 **Funding**

387 The authors declare that no funds, grants, or other support were received during the preparation of this  
388 manuscript.

## 389 **Declaration**

390 We confirm that the manuscript has been read and approved by all named authors and that there are no  
391 other persons who satisfied the criteria for authorship but are not listed.

## 392 **Conflict of Interest**

393 All authors declare that they have no conflicts of interest.



## 394 **References**

- 395 1. WHO. World Report On Disability. World Health [Internet]. 2011;1–24. Available from:  
396 [www.who.int/about/licensing/copyright\\_form/en/index.html](http://www.who.int/about/licensing/copyright_form/en/index.html)  
397 [http://www.larchetoronto.org/  
wordpress/wp-content/uploads/2012/01/launch-of-World-Report-on-Disability-Jan-27-121.pdf](http://www.larchetoronto.org/wordpress/wp-content/uploads/2012/01/launch-of-World-Report-on-Disability-Jan-27-121.pdf)
- 398 2. Central Bureau of Statistics. Nepal living standards survey. 2011;(November):1–146.
- 399 3. Washington Group on Disability statistics. Disability Research Center studies. BMC Public Health.  
400 2020;20(1):1–13.
- 401 4. Emerson E, Madden R, Graham H, Llewellyn G, Hatton C, Robertson J. The health of disabled  
402 people and the social determinants of health. Public Health. 2011;
- 403 5. Filmer D. Disability, poverty, and schooling in developing countries: Results from 14 household  
404 surveys. World Bank Econ Rev. 2008;
- 405 6. Parish SL, Grinstein-Weiss M, Yeo YH, Rose RA, Rimmerman A. Assets and income: Disability-  
406 based disparities in the United States. In: Social Work Research. 2010.
- 407 7. Mithen J, Aitken Z, Ziersch A, Kavanagh AM. Inequalities in social capital and health between  
408 people with and without disabilities. Soc Sci Med. 2015;
- 409 8. WHO/UNFPA. Promoting sexual and reproductive health for persons with disabilities. Vol. 72,  
410 Physics Letters B. 354–356 p.
- 411 9. UNFPA. Emerging issues: sexual and reproductive health of persons with disabilities. 2007;1–10.
- 412 10. E. S, S.F. M, A.K. Y, L. K. Barriers to accessing safe motherhood and reproductive health services:  
413 The situation of women with disabilities in Lusaka, Zambia. Disability and Rehabilitation. 2004.

- 414 11. Rohleder P, Eide AH, Swartz L, Ranchod C, Schneider M, Schür C. Gender differences in HIV  
415 knowledge and unsafe sexual behaviours among disabled people in South Africa. *Disabil Rehabil.*  
416 2012;
- 417 12. Aderemi Dr TJ, Mac-Seing M, Woreta SA, Mati KA. Determinants of utilization of voluntary HIV  
418 counselling and testing services among individuals with disabilities in Ethiopia. 20th International  
419 AIDS Conference, July 20-25, 2014, Melbourne, Australia. 2014.
- 420 13. J.-F. T, J. B, M. K, O. B, T. M, N. B, et al. Access to health care, reproductive health and disability: A  
421 large scale survey in Sierra Leone. *Soc Sci Med.* 2011;
- 422 14. Groce NE. HIV/AIDS and people with disability. *Lancet.* 2003.
- 423 15. Hanass-Hancock J. Interweaving conceptualizations of gender and disability in the context of  
424 vulnerability to HIV/AIDS in KwaZulu-Natal, South Africa. *Sex Disabil.* 2009;
- 425 16. The World Bank. HIV/AIDS and disability: capturing hidden voices: Report of the World Bank/Yale  
426 University Global Survey on HIV/AIDS and Disability. 2004;1–31.
- 427 17. Mailhot Amborski A, Bussières EL, Vaillancourt-Morel MP, Joyal CC. Sexual Violence Against  
428 Persons With Disabilities: A Meta-Analysis. *Trauma, Violence, Abus.* 2021;
- 429 18. Starrs AM, Ezeh AC, Barker G, Basu A, Bertrand JT, Blum R, et al. Accelerate progress—sexual and  
430 reproductive health and rights for all: report of the Guttmacher–Lancet Commission. *The Lancet.*  
431 2018.
- 432 19. Ministry of Health (MoH)/Department of Health Services (DoHS). Disability Management  
433 (prevention, treatment and rehabilitation) policy, strategy and 10 year action plan. 2017;

- 434 20. Justice M of. Convention on the rights of persons with disabilities. 2011;6(3):225.
- 435 21. Government of Nepal. The Constitution of Nepal. 2015;1–226.
- 436 22. Ministry of Health. Nepal Health Sector Strategy. Nepal Heal Sect Strateg. 2015;
- 437 23. Eide AH, Shailes N, Karl-G H. Living conditions among people with disabilities in Nepal. A National  
438 Representative Study. 2016;1–99. Available from:  
439 file:///C:/Users/ICS/Downloads/Eide2016\_Living conditions among people with disability in  
440 Nepal.pdf
- 441 24. Kaufman MR, Cornish F, Zimmerman RS, Johnson BT. Health behavior change models for HIV  
442 prevention and AIDS care: Practical recommendations for a multi-level approach. J Acquir  
443 Immune Defic Syndr. 2014;
- 444 25. Nations U. International Conference on Population and Development. Asia-Pacific Popul J  
445 [Internet]. 1994;9(3):1–2. Available from: [https://www.un-](https://www.un-ilibrary.org/content/journals/15644278/9/3/9)  
446 [ilibrary.org/content/journals/15644278/9/3/9](https://www.un-ilibrary.org/content/journals/15644278/9/3/9)
- 447 26. Harzing AW. Publish or Perish [Internet]. 2007 [cited 2022 Feb 8]. Available from:  
448 <https://harzing.com/resources/publish-or-perish>
- 449 27. Devkota HR, Kett M, Groce N. Societal attitude and behaviours towards women with disabilities  
450 in rural Nepal: Pregnancy, childbirth and motherhood. BMC Pregnancy Childbirth. 2019;
- 451 28. Subedi L, Regmi MC. PIH30 CHALLENGES FACED BY PEOPLE WITH PHYSICAL DISABILITIES IN  
452 ACCESSING SEXUAL AND REPRODUCTIVE HEALTH SERVICES IN EASTERN REGION OF NEPAL. Value  
453 Heal. 2019;

- 454 29. Wilbur J, Kayastha S, Mahon T, Torondel B, Hameed S, Sigdel A, et al. Qualitative study exploring  
455 the barriers to menstrual hygiene management faced by adolescents and young people with a  
456 disability, and their carers in the Kavrepalanchok district, Nepal. *BMC Public Health*. 2021;
- 457 30. Devkota HR, Murray E, Kett M, Groce N. Are maternal healthcare services accessible to  
458 vulnerable group? A study among women with disabilities in rural Nepal. *PLoS One*. 2018;
- 459 31. Shiwakoti R, Gurung YB, Pathak RS, Poudel RC, Neupane S, Thapa RK, et al. Factors affecting  
460 utilization of sexual and reproductive health services among women with disabilities- A mixed-  
461 method cross-sectional study from Ilam district, Nepal. *BMC Health Serv Res [Internet]*. 2021;  
462 Available from: <https://doi.org/10.21203/rs.3.rs-131588/v1>
- 463 32. Tanabe M, Nagujjah Y, Rimal N, Bukania F, Krause S. Intersecting Sexual and Reproductive Health  
464 and Disability in Humanitarian Settings: Risks, Needs, and Capacities of Refugees with Disabilities  
465 in Kenya, Nepal, and Uganda. *Sex Disabil*. 2015;
- 466 33. Puri M, Misra G, Hawkes S. Hidden voices: prevalence and risk factors for violence against  
467 women with disabilities in Nepal. *BMC Public Health*. 2015;
- 468 34. Morrison J, Basnet M, Budhathoki B, Adhikari D, Tumbahangphe K, Manandhar D, et al. Disabled  
469 women's maternal and newborn health care in rural Nepal: A qualitative study. *Midwifery*  
470 [Internet]. 2014;30(11):1132–9. Available from:  
471 <https://www.sciencedirect.com/science/article/pii/S0266613814000928>
- 472 35. Gupta J, Cardoso LF, Ferguson G, Shrestha B, Shrestha PN, Harris C, et al. Disability status,  
473 intimate partner violence and perceived social support among married women in three districts  
474 of the Terai region of Nepal. *BMJ Glob Heal*. 2018;

- 475 36. Wilbur J, Mahon T, Torondel B, Hameed S, Kuper H. Feasibility study of a menstrual hygiene  
476 management intervention for people with intellectual impairments and their carers in Nepal. *Int J*  
477 *Environ Res Public Health*. 2019;
- 478 37. Devkota HR, Clarke A, Murray E, Groce N. Do experiences and perceptions about quality of care  
479 differ among social groups in Nepal?: A study of maternal healthcare experiences of women with  
480 and without disabilities, and Dalit and non-Dalit women. *PLoS One*. 2017;
- 481 38. Devkota HR, Murray E, Kett M, Groce N. Healthcare provider's attitude towards disability and  
482 experience of women with disabilities in the use of maternal healthcare service in rural Nepal.  
483 *Reprod Health*. 2017;
- 484 39. Raut N. Case studies on sexual and reproductive health of disabled women in Nepal. *Asian J*  
485 *Women's Stud*. 2018;
- 486 40. Devkota HR, Clarke A, Murray E, Kett M, Groce N. Disability, Caste, and Intersectionality: Does  
487 Co-Existence of Disability and Caste Compound Marginalization for Women Seeking Maternal  
488 Healthcare in Southern Nepal? *Disabilities*. 2021;
- 489 41. Wilbur J, Scherer N, Mactaggart I, Shrestha G, Mahon T, Torondel B, et al. Are Nepal's water,  
490 sanitation and hygiene and menstrual hygiene policies and supporting documents inclusive of  
491 disability? A policy analysis. *Int J Equity Health*. 2021;
- 492 42. Adhikari KP. Realising the Rights of Persons with Disability in Nepal: Policy Addresses From the  
493 Health, Education and Livelihoods Perspectives. *Nepal J Dev Rural Stud*. 2019;
- 494 43. Institute of Development Studies. Disability Inclusive Development Nepal Situational Analysis  
495 June 2020 update. 2020;(April 2019):40.

- 496 44. Nepal P of. The Right to Safe Motherhood and Reproductive Act 2018. Gov Nepal.  
497 2018;2075(September):1–13.
- 498 45. Disabilities AR to R of P with. The Act Relating to Rights of Persons with Disabilities , 2074 ( 2017  
499 ). 2018;2074(October 2017):1–34.
- 500 46. Department of Health Services, Ministry of Health and Populatin G of N. National Guidelines for  
501 Disability Inclusive Health Services , 2019. 2019;1–55.
- 502 47. MoHP. National Medical Standard for Maternal and Newborn Care Ministry of Health and  
503 Population National Medical Standard for Maternal and Newborn Care Volume III , 3rd Edition  
504 2020. 2020;III(July).
- 505 48. Health M of. National Family Planning Costed Implementation Plan 2012-2015. J Med Philos.  
506 2012;39(1):90.
- 507 49. MoHP. Health sector strategy implementation plan 2017-20. 2017;(2):2–5.
- 508 50. MoHP. Demographic Health Sruvey. 2016;14(1):54–9.
- 509 51. CBS. Nepal Multiple Indicator Cluster Survey 2019,Survey Findings Report. 2020;
- 510 52. DoHS. Annual Report DoHS 2019/2020. 2020;205–8.
- 511 53. Ministry of Health and Population Nepal, New ERA, UNICEF, EU, USAID, CDC. Nepal National  
512 Micronutrient Status Survey 2016. 2018;1–315. Available from:  
513 [https://www.unicef.org/nepal/sites/unicef.org.nepal/files/2018-08/NNMSS Report 2016.pdf](https://www.unicef.org/nepal/sites/unicef.org.nepal/files/2018-08/NNMSS_Report_2016.pdf)
- 514 54. Dhimal M, Bista B, Bhattarai S, Hyder MKA, Agarwal N, Rani M JA. Noncommunicable Disease Risk  
515 Factors : STEPS Survey Nepal 2019. Nepal Heal Res Counc [Internet]. 2019;8(May):284. Available

- 516 from: [www.who.int/dietphysicalactivity/%0Ahttps://www.who.int/docs/default-source/nepal-](https://www.who.int/dietphysicalactivity/%0Ahttps://www.who.int/docs/default-source/nepal-)  
517 [documents/ncds/ncd-steps-survey-2019-compressed.pdf?sfvrsn=807bc4c6\\_2](https://www.who.int/docs/default-source/nepal-documents/ncds/ncd-steps-survey-2019-compressed.pdf?sfvrsn=807bc4c6_2)
- 518 55. Iv R. Integrated Biological and Behavioral Surveillance ( IBBS ) Survey among Men who have Sex  
519 with Men ( MSM ) and Transgender ( TG ) People in Kathmandu Valley , Nepal Round IV – 2012  
520 Ministry of Health and Population National Centre for AIDS and STD Control. 2012;
- 521 56. CBS. National Population and Housing Census 2011. 2012;111(3):51–7.
- 522 57. Government of Nepal. Economic Survey 2019/20. Minist Financ [Internet]. 2020;1–144. Available  
523 from: [https://mof.gov.np/uploads/document/file/Economic Survey 2019\\_20201125024153.pdf](https://mof.gov.np/uploads/document/file/Economic%20Survey%202019_20201125024153.pdf)
- 524 58. Ganle JK, Baatiema L, Quansah R, Danso-Appiah A. Barriers facing persons with disability in  
525 accessing sexual and reproductive health services in sub-Saharan Africa: A systematic review.  
526 PLoS ONE. 2020.
- 527 59. Gartrell A, Baesel K, Becker C. “We do not dare to love”: Women with disabilities’ sexual and  
528 reproductive health and rights in rural Cambodia. *Reprod Health Matters*. 2017;
- 529 60. Sharma R, Singh A, Suri V, Kaur S. Barriers Faced by Women with Disabilities in Access to Sexual  
530 and Reproductive Healthcare: Experiences from North India. *Int J Prev Curative Community Med*.  
531 2015;
- 532 61. Sakellariou D, Rotarou ES. Utilisation of mammography by women with mobility impairment in  
533 the UK: Secondary analysis of cross-sectional data. *BMJ Open*. 2019;
- 534 62. Matin BK, Williamson HJ, Karyani AK, Rezaei S, Soofi M, Soltani S. Barriers in access to healthcare  
535 for women with disabilities: a systematic review in qualitative studies. *BMC Womens Health*.  
536 2021;

- 537 63. Banks LM, Kuper H, Polack S. Correction: Poverty and disability in low- and middle-income  
538 countries: A systematic review (PloS ONE (2017) 12, 12 (e0189996) DOI:  
539 10.1371/journal.pone.0189996). PLoS ONE. 2018.
- 540 64. Baart J, Taaka F. Barriers to healthcare services for people with disabilities in developing  
541 countries: A literature review. Disability, CBR and Inclusive Development. 2017.
- 542 65. Ali M, Farron M, Ouedraogo L, Mahaini RK, Miller K, Kabra R. Research gaps and emerging  
543 priorities in sexual and reproductive health in Africa and the eastern Mediterranean regions.  
544 Reproductive Health. 2018.
- 545 66. Mprah WK, Anafi P, Sekyere FO. Does disability matter? Disability in sexual and reproductive  
546 health policies and research in Ghana. Int Q Community Health Educ. 2014;
- 547 67. Wilbur J, Torondel B, Hameed S, Mahon T, Kuper H. Systematic review of menstrual hygiene  
548 management requirements, its barriers and strategies for disabled people. PLoS One. 2019;
- 549 68. Mac-Seing M, Ochola E, Ogwang M, Zinszer K, Zarowsky C. Policy Implementation Challenges and  
550 Barriers to Access Sexual and Reproductive Health Services Faced By People With Disabilities: An  
551 Intersectional Analysis of Policy Actors' Perspectives in Post-Conflict Northern Uganda. Int J Heal  
552 Policy Manag. 2021;
- 553 69. Burke E, Kébé F, Flink I, Van Reeuwijk M, May A Le. A qualitative study to explore the barriers and  
554 enablers for young people with disabilities to access sexual and reproductive health services in  
555 Senegal. Reprod Health Matters. 2017;
- 556 70. Bradbury-Jones C, Breckenridge JP, Devaney J, Kroll T, Lazenbatt A, Taylor J. Disabled women's  
557 experiences of accessing and utilising maternity services when they are affected by domestic



- 558           abuse: A critical incident technique study. BMC Pregnancy Childbirth. 2015;
- 559    71.    Lee K, Devine A, Marco MJ, Zayas J, Gill-Atkinson L, Vaughan C. Sexual and reproductive health  
560           services for women with disability: A qualitative study with service providers in the Philippines.  
561           BMC Womens Health. 2015;
- 562    72.    Banks LM, Kuper H, Polack S. Correction: Poverty and disability in low- and middle-income  
563           countries: A systematic review. PLoS One. 2018;
- 564

Figure 1: PRISMA flow chart of published articles reviewed

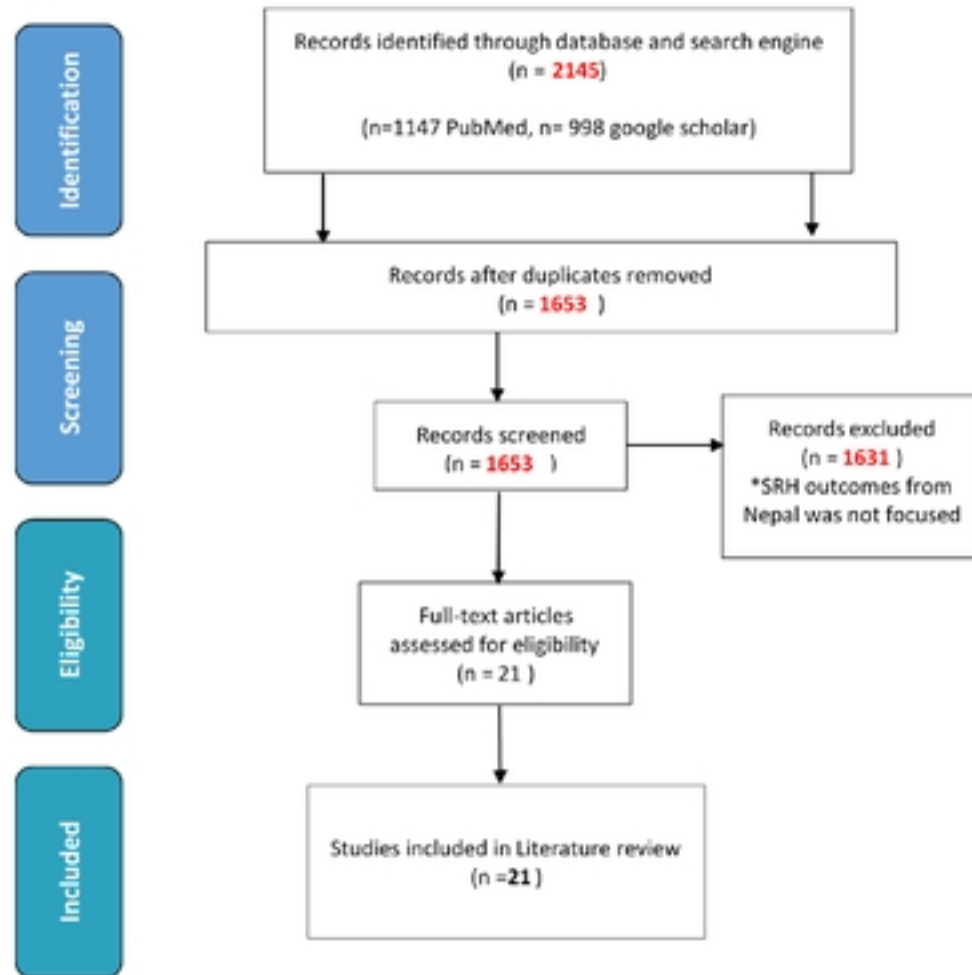

**Figure 2: Timeline of policy documents that have mentioned SRH of PWDs**

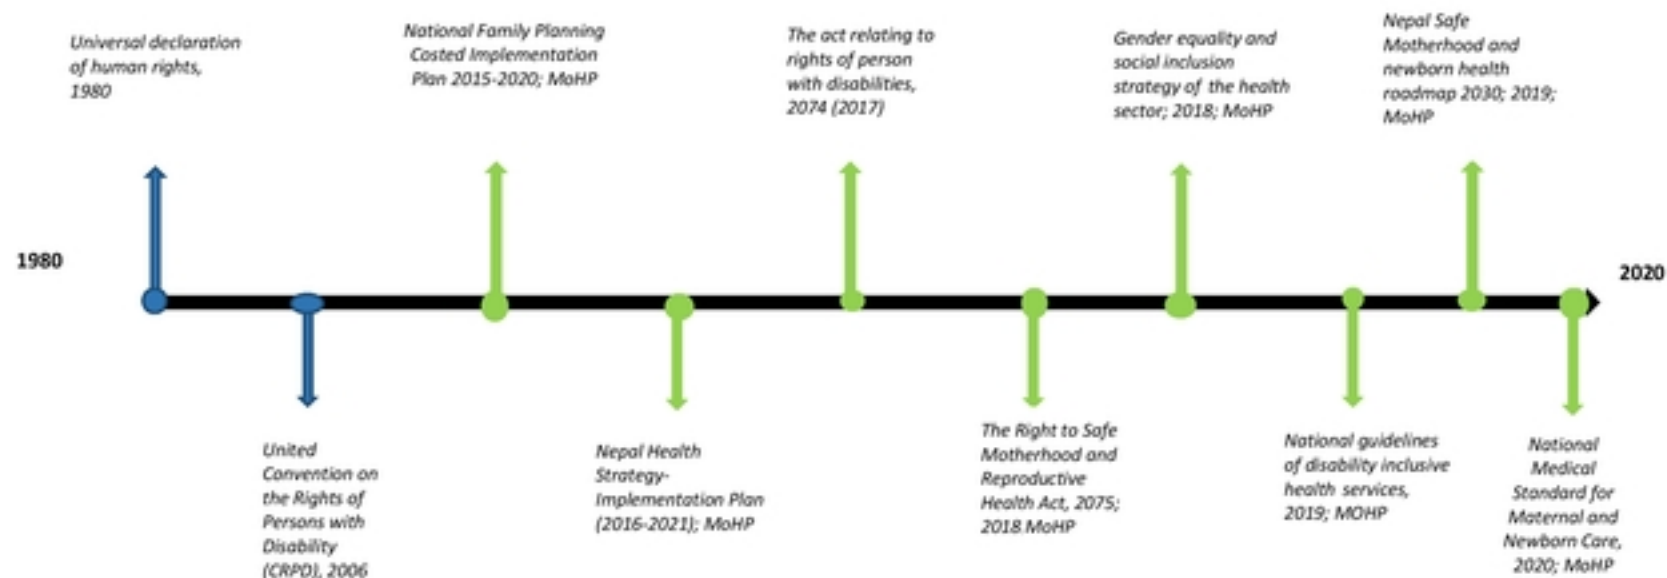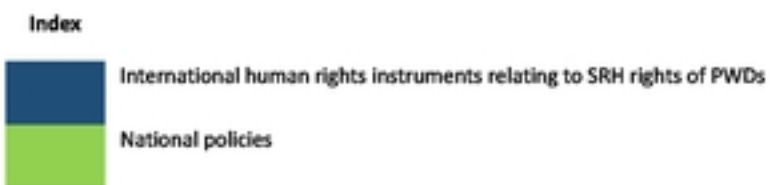

Source: https://medrxiv.org/content/10.1101/2023.04.19.23288803v1.full.pdf
